# Supplementary material
Source: PubMed Central journal article supplement (PMC3411360)
Supplement: Supp_Data.pdf [file Supp_Data.pdf]

## Supplementary Data

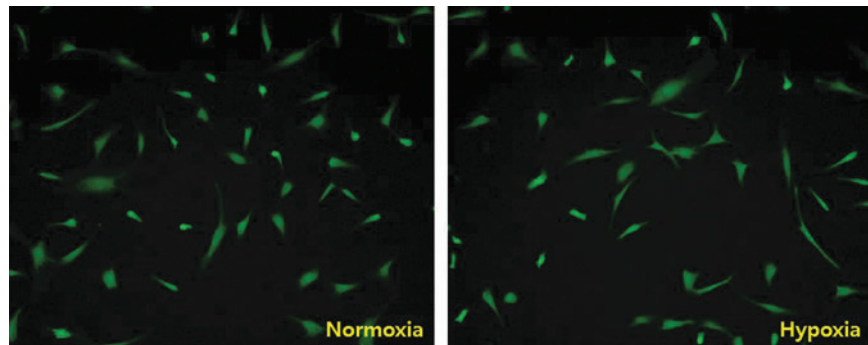

**SUPPLEMENTARY FIG. S1.** Effect of hypoxia on reactive nitrogen species generation. There was no difference in 4,5-diaminofluorescein diacetate intensities between normoxia and hypoxia.

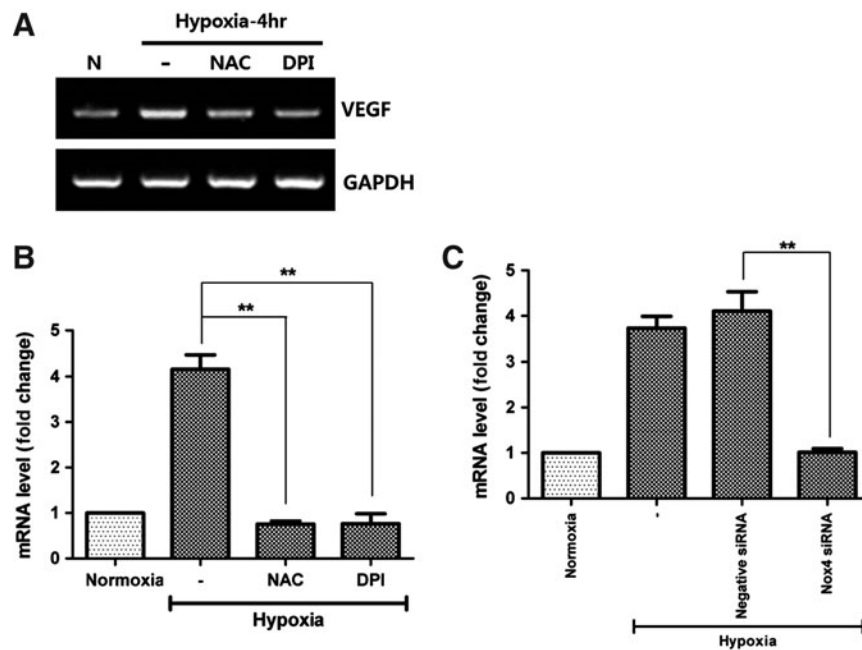

**SUPPLEMENTARY FIG. S2.** Effect of hypoxia and silencing of Nox4 on the mRNA expression of VEGF. Hypoxia significantly increased the VEGF expression, which was attenuated by NAC and DPI treatment (**A**). Relative mRNA expression was calculated by Q-PCR (**B**). Silencing of Nox4 reduced the hypoxia-enhanced mRNA expression of VEGF (**C**).  $**P < 0.01$ . VEGF, vascular endothelial growth factor; NAC, N-acetyl-cysteine; DPI, dibenziodolium chloride; Nox, NADPH oxidase; Q-PCR, quantitative real-time polymerase chain reaction.
